# Supplementary material for: Hsp90 Inhibition: A Promising Therapeutic Approach for ARSACS
Source: MDPI journal article supplement (doi:10.3390/ijms222111722), 2021-10-29
Supplement: s1 [file s1]

## Supplementary materials

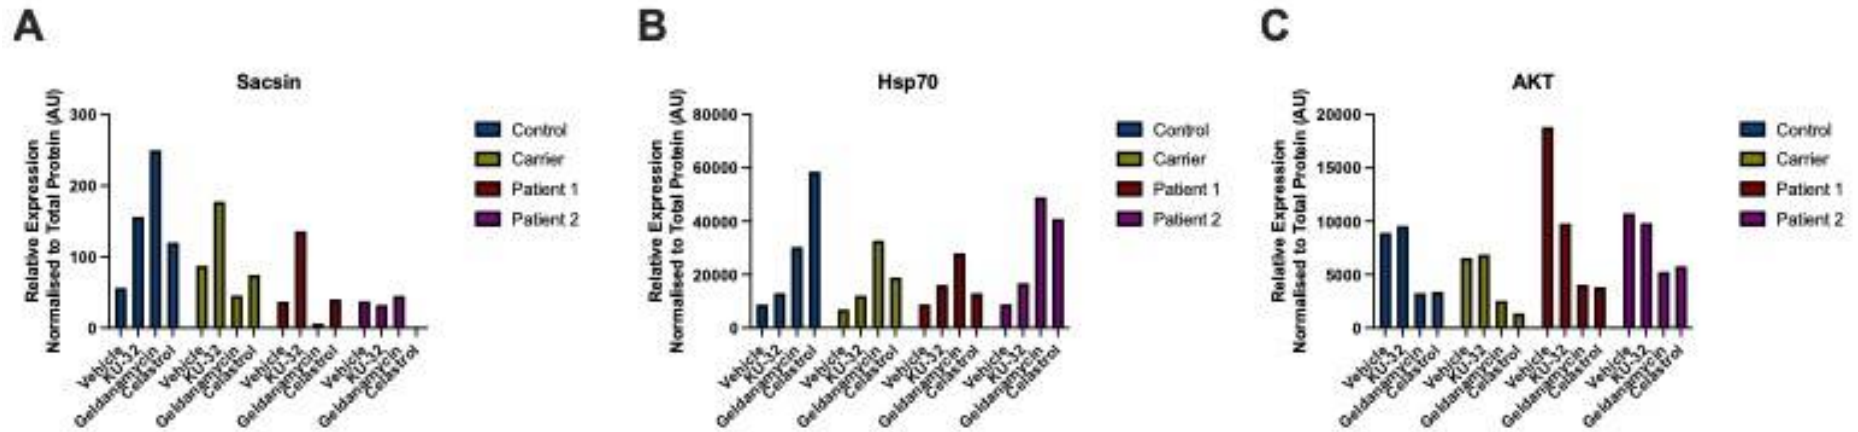

**Figure S1. Immunoblot analysis of sarsin, Hsp70 and AKT expression in Control, Carrier and Patient fibroblast lines treated with Hsp90 inhibitors.** Fibroblast lines were treated with DMSO vehicle, 100 nM KU-32, 500 nM geldanamycin or 1  $\mu$ M celestrol for 24 h prior to cell lysis. KU-32 and celestrol are C-terminal Hsp90 inhibitors, whilst geldanamycin is an N-terminal Hsp90 inhibitor. **(A)** Densitometric quantitative analysis of sarsin expression shows a relative increase in sarsin expression across three out of four cell lines. **(B)** Hsp70 is a signature of the heat-shock response, and Hsp90 inhibition leads to an increase in Hsp70 levels. Densitometric quantitative analysis shows that KU-32 can induce Hsp70 expression at the concentration used in this study, but not as potently as geldanamycin or celestrol. **(C)** AKT is a client of Hsp90, and so its levels should be reduced upon Hsp90 inhibition. Geldanamycin and celestrol reduce AKT levels compared to Vehicle; however, there is limited degradation of AKT with KU-32 treatment, consistent with previous reports [1].

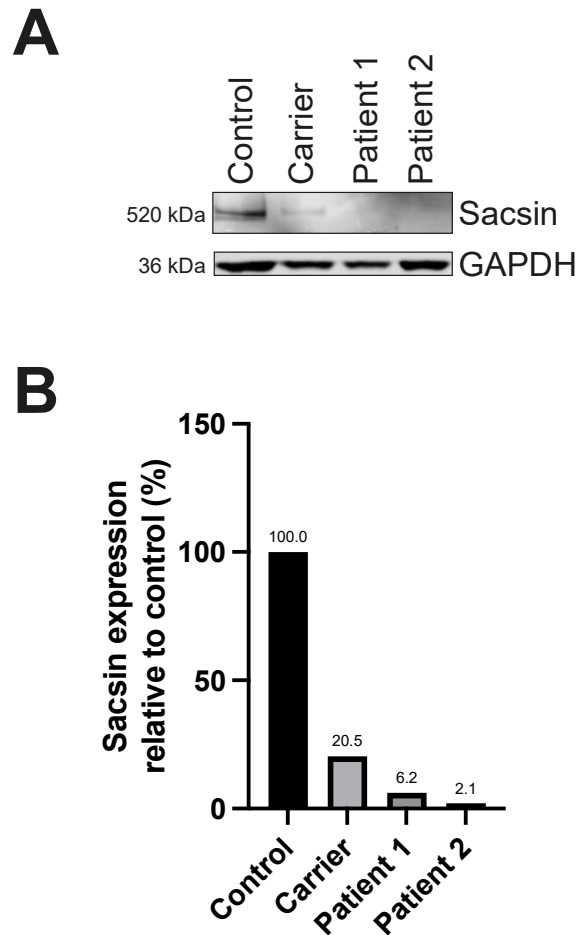

**Figure S2. Sacsin expression in fibroblast lines used in this study.** Immunoblot analysis of whole cell lysates from Control, Carrier, Patient 1 and Patient 2 cell lines. **(A)** Immunoblot probed with antibodies to saccsin and GAPDH. **(B)** Densitometric quantitative analysis of immunoblot showing saccsin expression relative to the band intensity of the Control Line. Loading was normalised using Total Protein Stain. Saccsin expression in Patient Lines 1 and 2 was severely reduced, whilst expression in the Carrier Line was intermediate.

## References

1. Urban, M.J.; Li, C.; Yu, C.; Lu, Y.; Krise, J.M.; McIntosh, M.P.; Rajewski, R.A.; Blagg, B.S.J.; Dobrowsky, R.T. Inhibiting Heat-Shock Protein 90 Reverses Sensory Hypoalgesia in Diabetic Mice. *ASN Neuro* **2010**, *2*, e00040, doi:10.1042/AN20100015.
